# Supplementary material for: Defect and interlayer spacing engineering of vanadium selenide for boosting sodium-ion storage
Source: Royal Society of Chemistry journal article supplement (doi:10.1039/d3ta06115a), 2023-11-28
Supplement: d3ta06115a1.pdf [file d3ta06115a1.pdf]

*Electronic Supplementary Material (ESI) for Journal of Materials Chemistry A.*

**Defect and interlayer spacing engineering of vanadium selenide for boosting sodium-ion storage**

*Wang Feng,<sup>‡a</sup> Xia Wen,<sup>‡a</sup> Yanan Peng,<sup>a</sup> Luying Song,<sup>a</sup> Xiaohui Li,<sup>a</sup> Ruofan Du,<sup>a</sup> Junbo Yang,<sup>a</sup> Yulin Jiang,<sup>a</sup> Hui Li,<sup>a</sup> Hang Sun,<sup>a</sup> Ling Huang,<sup>a</sup> Jun He<sup>b</sup> and Jianping Shi<sup>\*a</sup>*

<sup>a</sup>The Institute for Advanced Studies, Wuhan University, Wuhan 430072, China.

Email: jianpingshi@whu.edu.cn

<sup>b</sup>Key Laboratory of Artificial Micro- and Nano-structures of Ministry of Education, School of Physics and Technology, Wuhan University, Wuhan 430072, China

<sup>‡</sup>These authors contributed equally to this work.

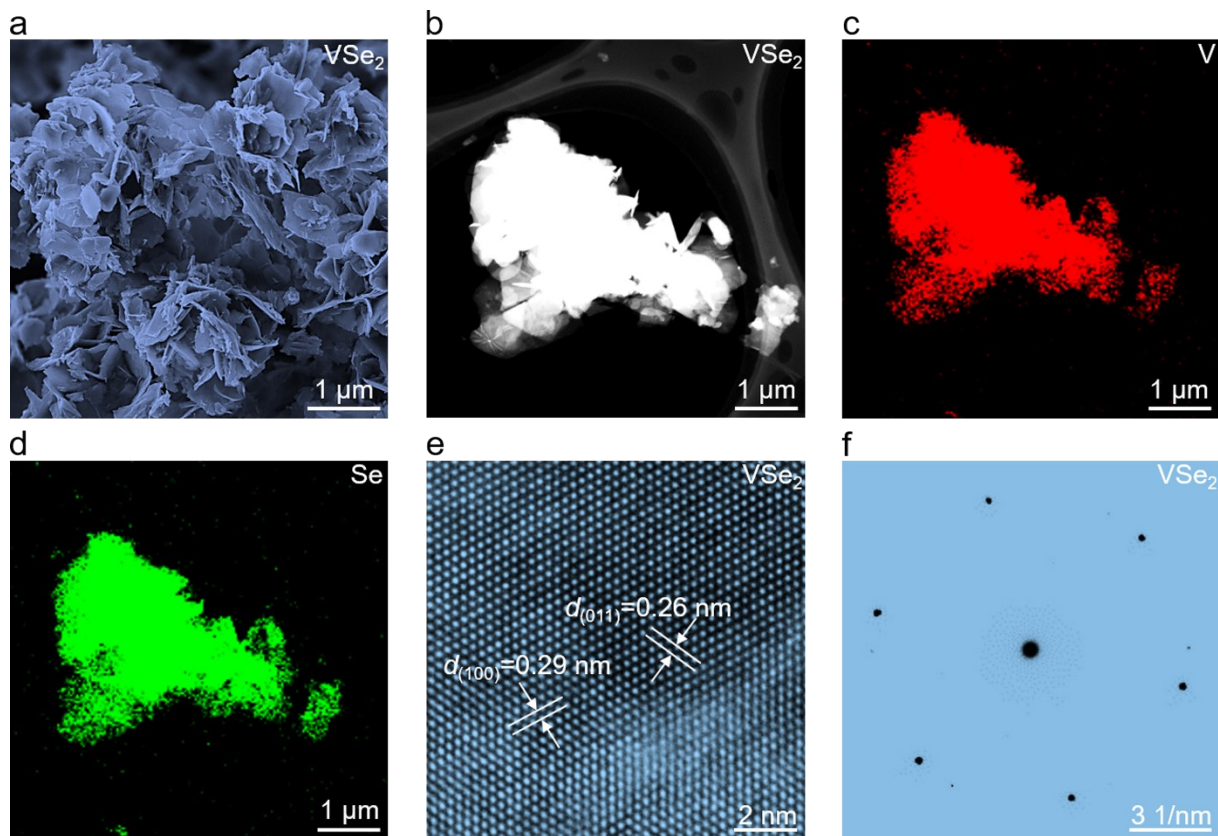

Fig. S1 Morphology and atomic structure characterization of as-grown pure VSe<sub>2</sub>. (a) SEM image of pure VSe<sub>2</sub>, showing its layered structure. (b) Low-magnification TEM image of pure VSe<sub>2</sub>. (c,d) EDS maps of pure VSe<sub>2</sub>, indicating the uniform distribution of V and Se elements. (e) Atomic-resolution TEM image of pure VSe<sub>2</sub>, showing its high crystalline quality. (f) Corresponding selected area electron diffraction (SAED) pattern of pure VSe<sub>2</sub>.

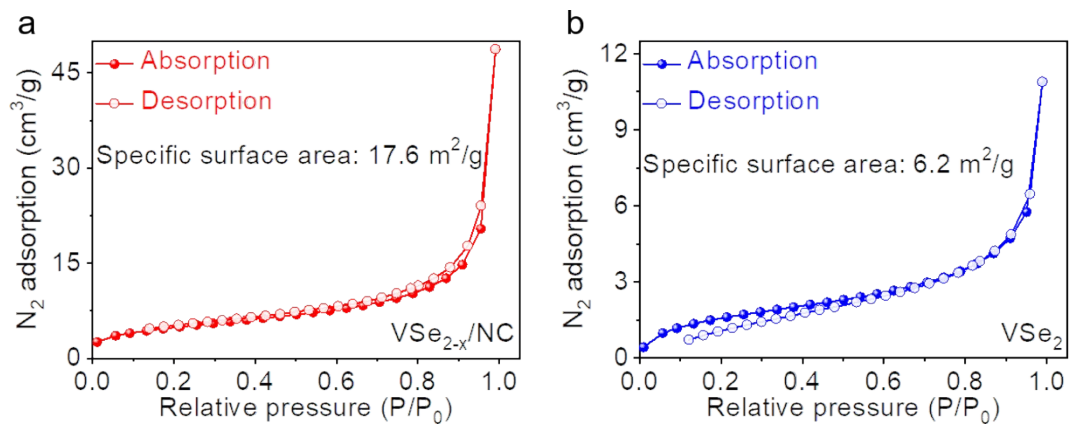

Fig. S2 Specific surface area determination of VSe<sub>2-x</sub>/NC (a) and pure VSe<sub>2</sub> (b) by nitrogen adsorption/desorption isotherms. The specific surface areas of VSe<sub>2-x</sub>/NC and pure VSe<sub>2</sub> are calculated to be 17.6 and 6.2 m<sup>2</sup>/g, respectively.

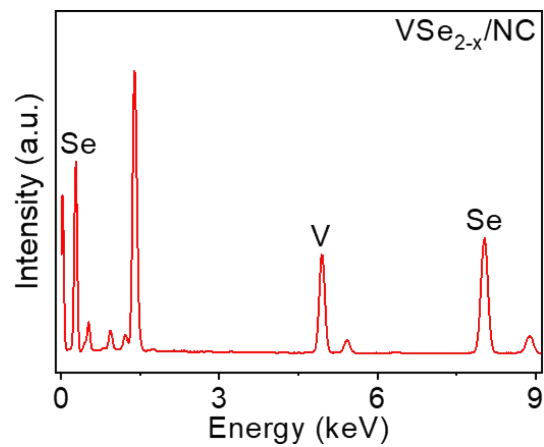

Fig. S3 EDS analysis of as-grown  $VSe_{2-x}/NC$ . The atomic ratio of V and Se is calculated to be 1:1.8, higher than the stoichiometric ratio of  $VSe_2$ , indicating the formation of Se vacancy in  $VSe_{2-x}/NC$ .

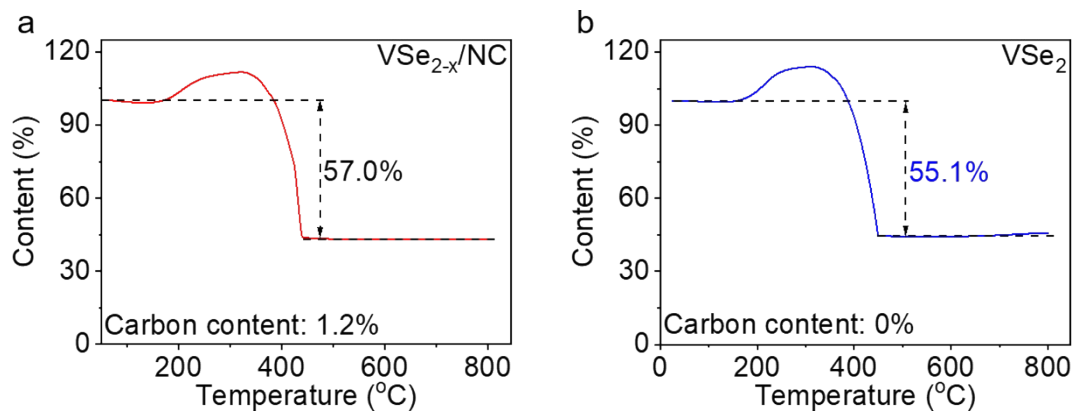

Fig. S4 Thermogravimetric analysis (TGA) curves of  $VSe_{2-x}/NC$  (a) and pure  $VSe_2$  (b). The carbon contents of  $VSe_{2-x}/NC$  and pure  $VSe_2$  are assessed to be 1.2% and 0%, respectively.

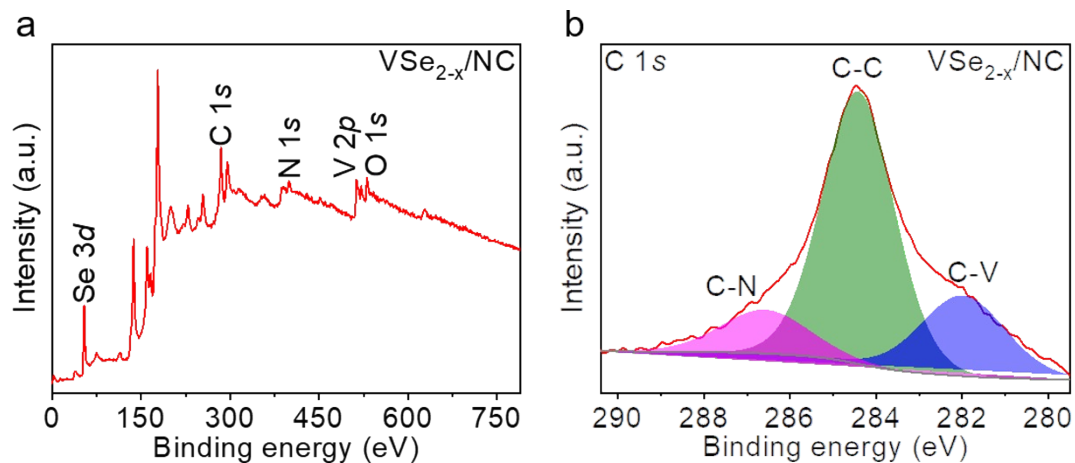

Fig. S5 XPS characterization of as-grown VSe<sub>2-x</sub>/NC. (a) XPS spectrum acquired over a wide range of binding energies (0~780 eV). (b) High resolution XPS spectrum of C 1s. The binding energies of C-N, C-C, and C-V are located at 286.6, 284.4, and 282.0 eV, respectively.

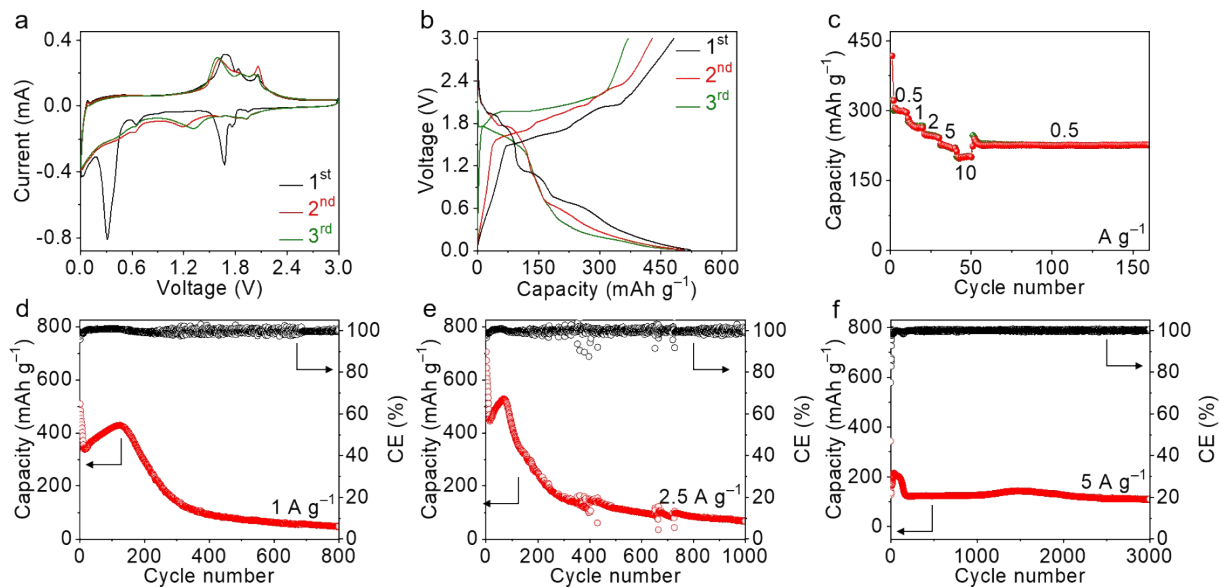

Fig. S6 Sodium-ion storage performances of pure VSe<sub>2</sub>. (a) CV curves of pure VSe<sub>2</sub> in the first three cycles with a scan rate of 0.1 mV s<sup>-1</sup>. (b) Galvanostatic charging/discharging curves of pure VSe<sub>2</sub> in the first three cycles at the current density of 1 A g<sup>-1</sup>. (c) Rate capabilities of pure VSe<sub>2</sub> at different current densities. (d–f) Cycling performances of pure VSe<sub>2</sub> at the current densities of 1, 2.5, and 5 A g<sup>-1</sup>, respectively.

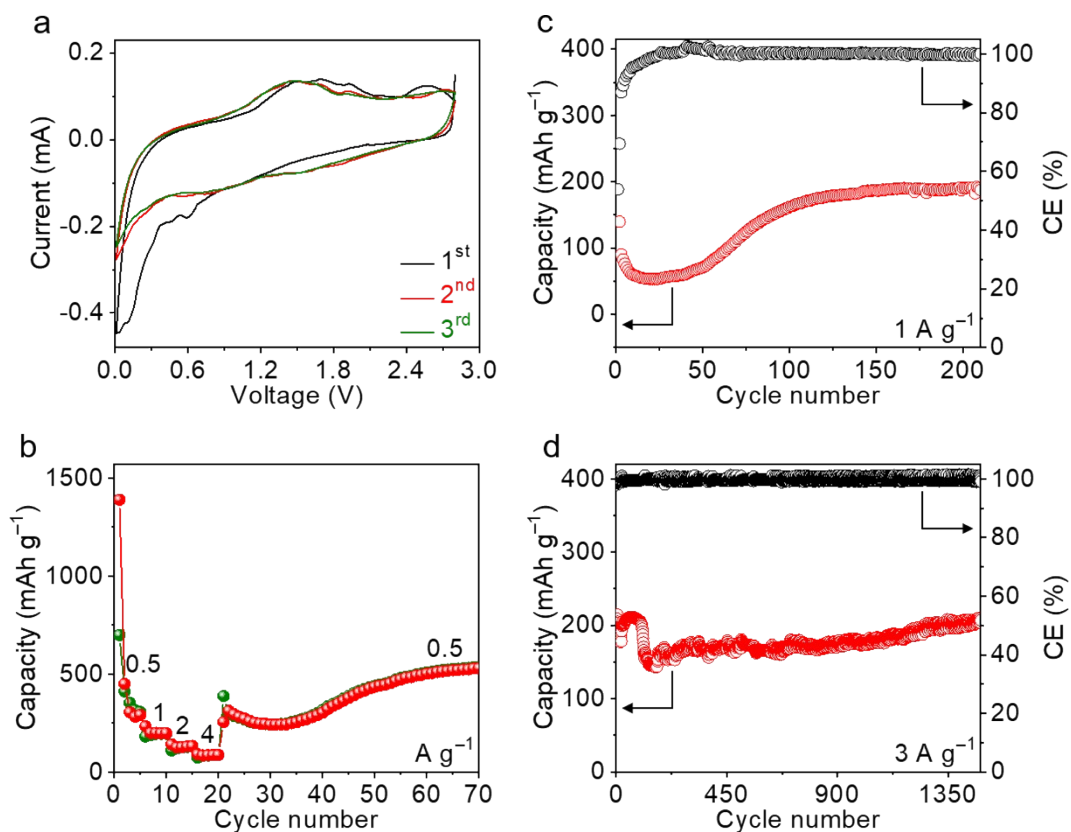

Fig. S7 Potassium-ion storage performances of  $VSe_{2-x}/NC$ . (a) CV curves of  $VSe_{2-x}/NC$  in the first three cycles with a scan rate of  $0.1 \text{ mV s}^{-1}$ . (b) Rate capabilities of  $VSe_{2-x}/NC$  at different current densities. (c,d) Cycling performances of  $VSe_{2-x}/NC$  at the current densities of 1 and 3  $\text{A g}^{-1}$ , respectively.



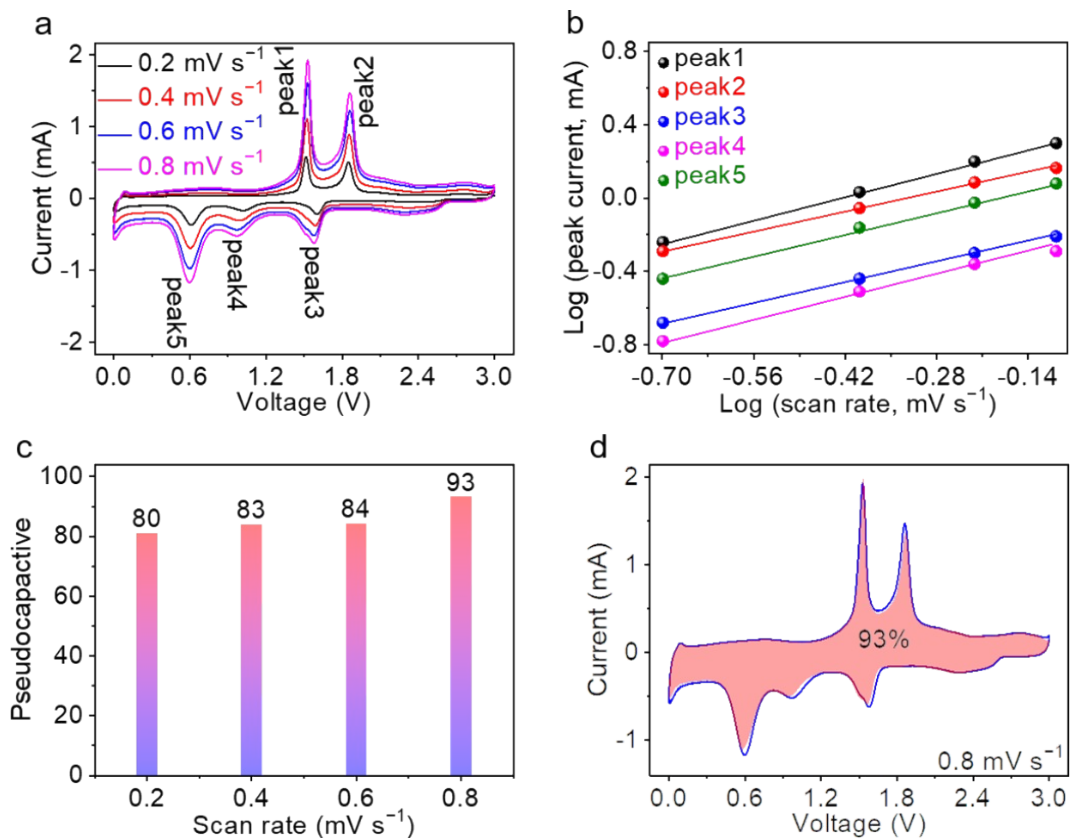

Fig. S8 Electrochemical kinetics of VSe<sub>2-x</sub>/NC. (a) CV curves of VSe<sub>2-x</sub>/NC at different scan rates. (b) The *b* values extracted from different scan rates. (c) Pseudocapacitive contributions of VSe<sub>2-x</sub>/NC at different scan rates. (d) CV profile of VSe<sub>2-x</sub>/NC with the pseudocapacitive contribution at a scan rate of 0.8 mV s<sup>-1</sup>.

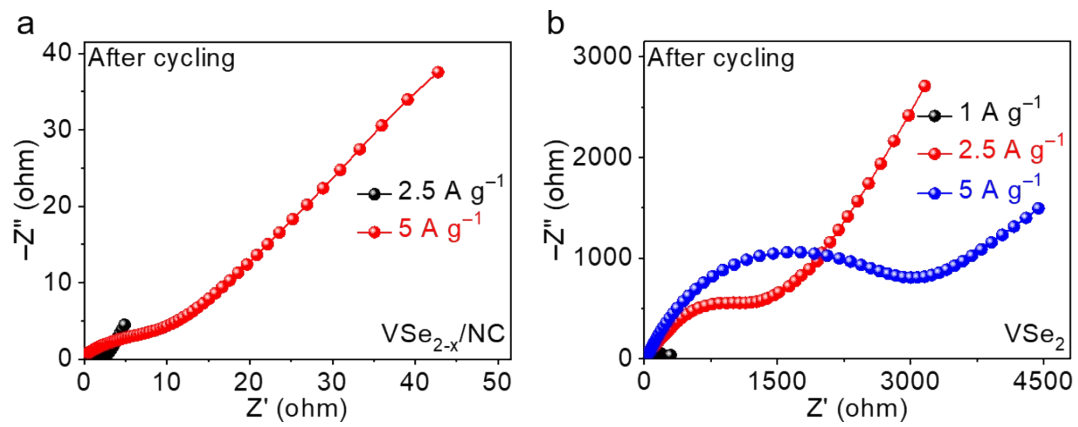

Fig. S9 EIS curves of  $VSe_{2-x}/NC$  (a) and pure  $VSe_2$  (b) after the cycling tests at different current densities. The small resistance indicates the fast charge transfer in  $VSe_{2-x}/NC$ .

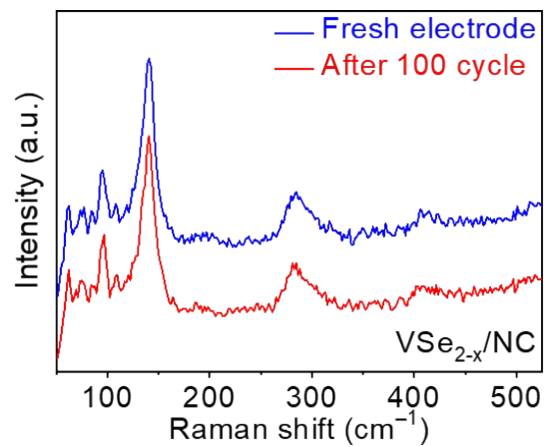

Fig. S10 Raman spectra of VSe<sub>2-x</sub>/NC after different cycling numbers. The Raman characteristic peaks of VSe<sub>2-x</sub> are still reserved, indicating its robust atomic structure.

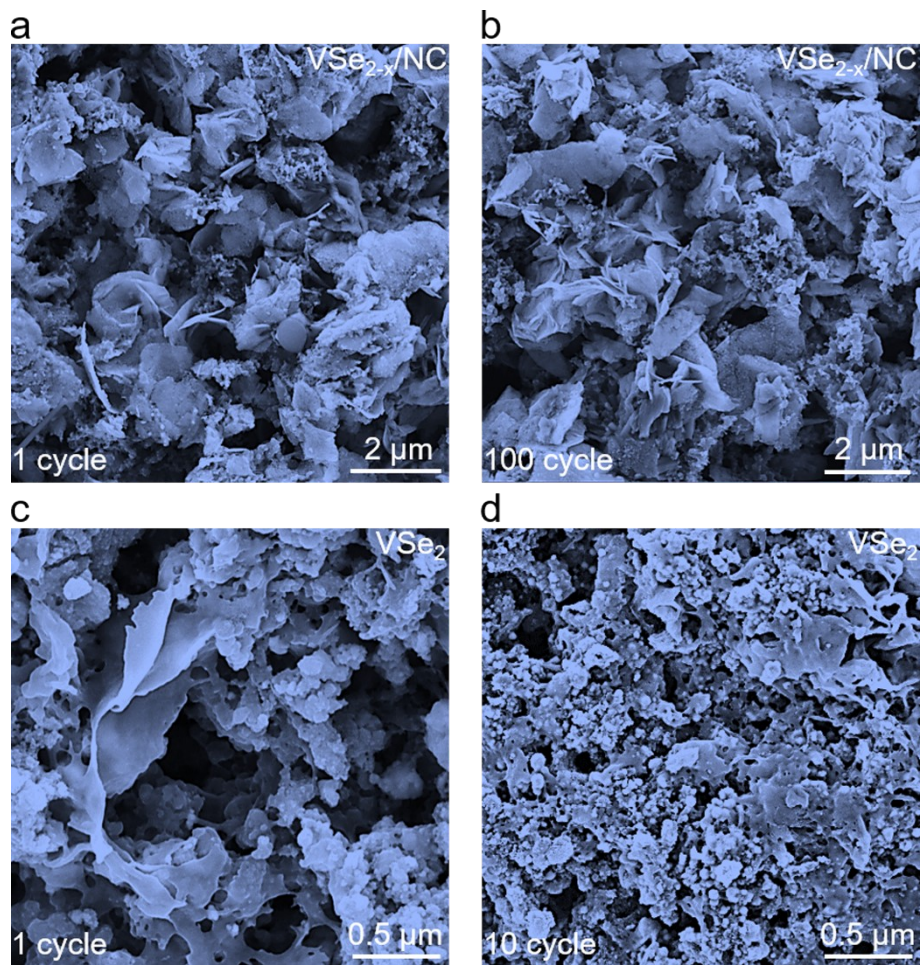

Fig. S11 Morphology characterization of  $VSe_{2-x}/NC$  and pure  $VSe_2$  after cycling tests. (a,b) SEM images of  $VSe_{2-x}/NC$  after 1 and 100 cycles. (c,d) SEM images of pure  $VSe_2$  after 1 and 10 cycles.

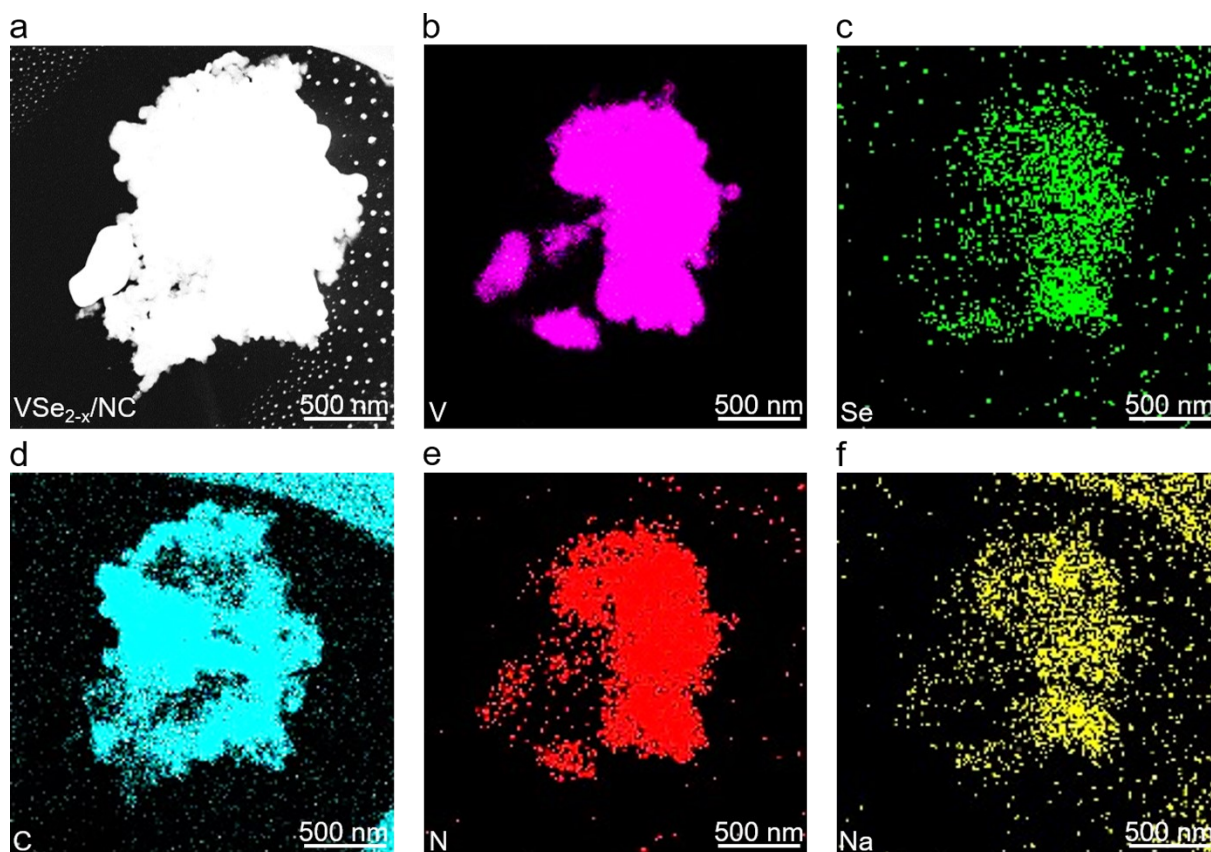

Fig. S12 Morphology and element distribution characterization of  $VSe_{2-x}/NC$  after discharging to 0.01 V. (a) Low-magnification TEM image of  $VSe_{2-x}/NC$  after discharging to 0.01 V. (b–f) Corresponding EDS maps of  $VSe_{2-x}/NC$ , indicating the uniform distribution of V, Se, C, N, and Na elements.



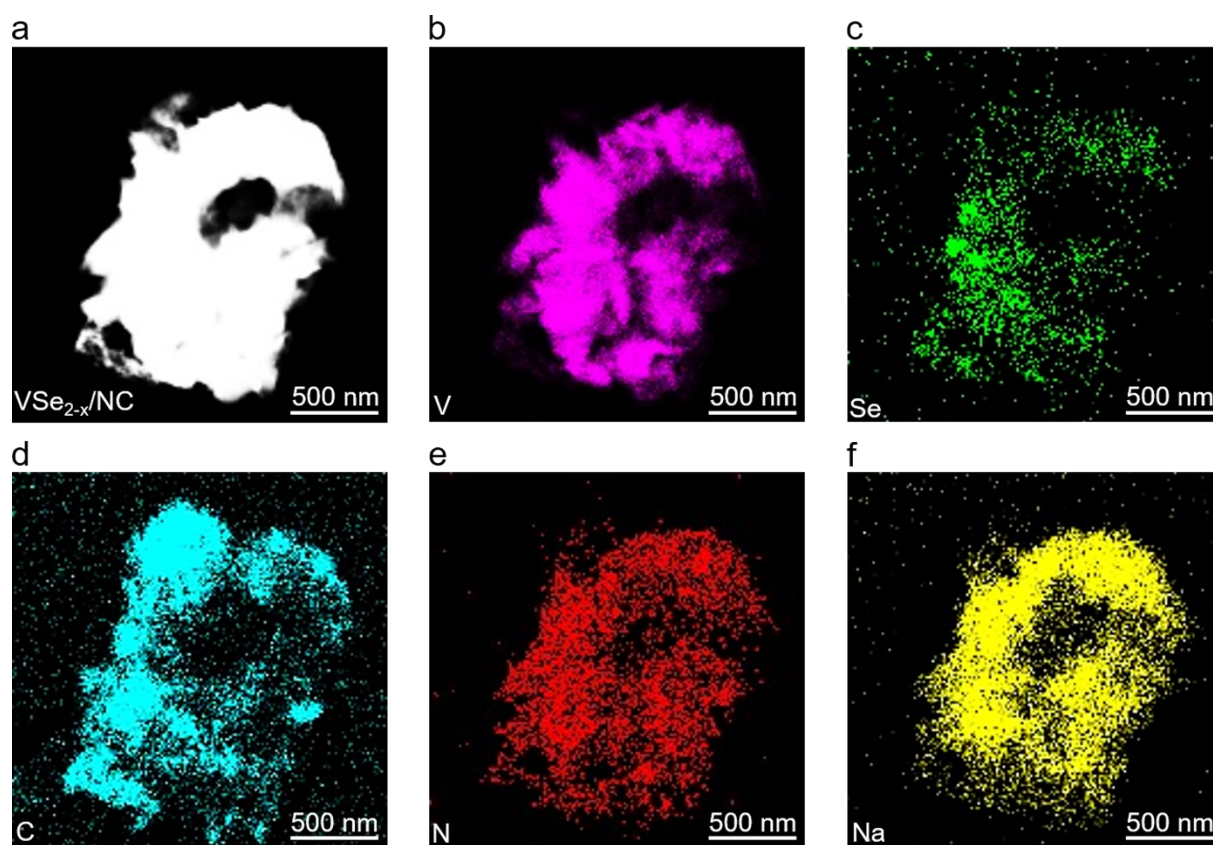

Fig. S13 Morphology and element distribution characterization of  $VSe_{2-x}/NC$  after charging to 3.0 V. (a) Low-magnification TEM image of  $VSe_{2-x}/NC$  after charging to 3.0 V. (b–f) Corresponding EDS maps of  $VSe_{2-x}/NC$ , indicating the uniform distribution of V, Se, C, N, and Na elements.

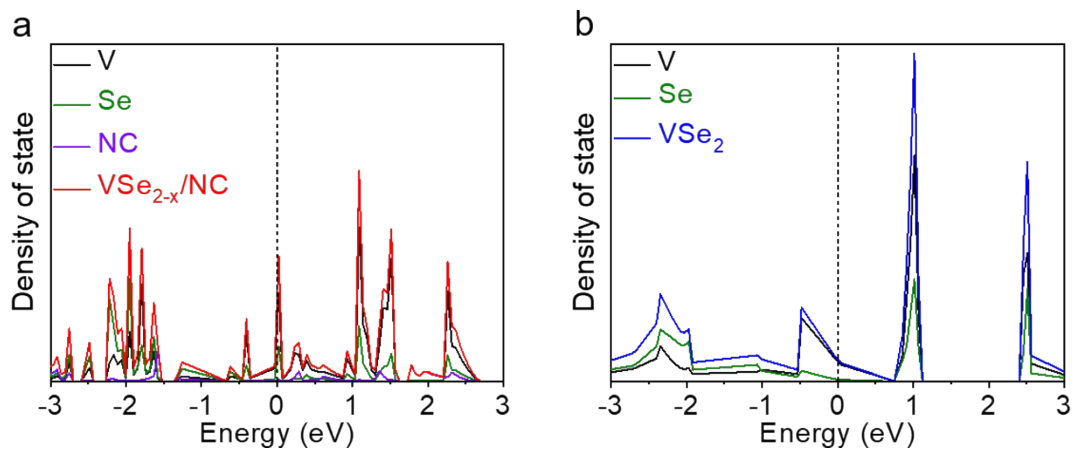

Fig. S14 Electronic structures of  $VSe_{2-x}/NC$  (a) and pure  $VSe_2$  (b). The high density of state (DOS) is observed at the Fermi level of  $VSe_{2-x}/NC$  comparing to pure  $VSe_2$ , which enhances the conductivity and accelerates the electron/ion transport.

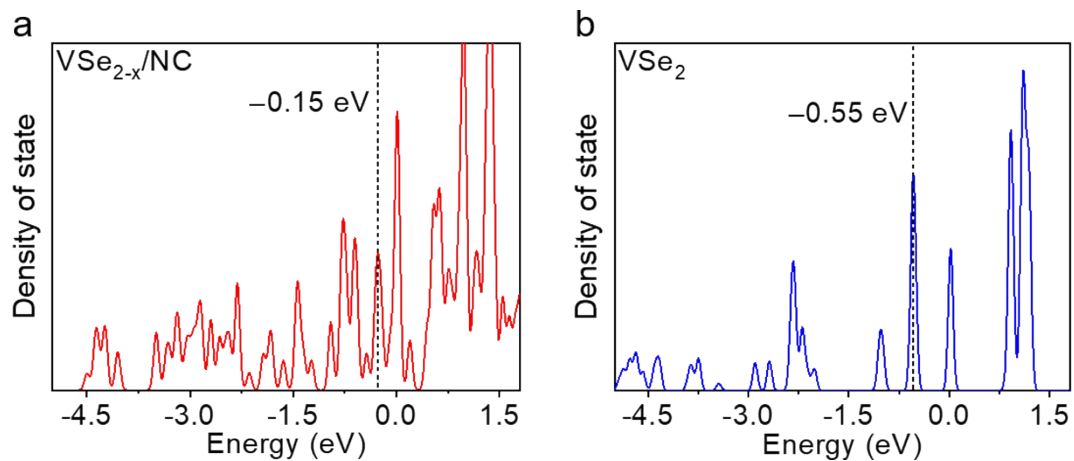

Fig. S15 DFT calculations of the V *d* band centers for  $VSe_{2-x}/NC$  (a) and pure  $VSe_2$  (b). The upshift of V *d* band center is observed for  $VSe_{2-x}/NC$ , which increases the metal-adsorbate interaction.



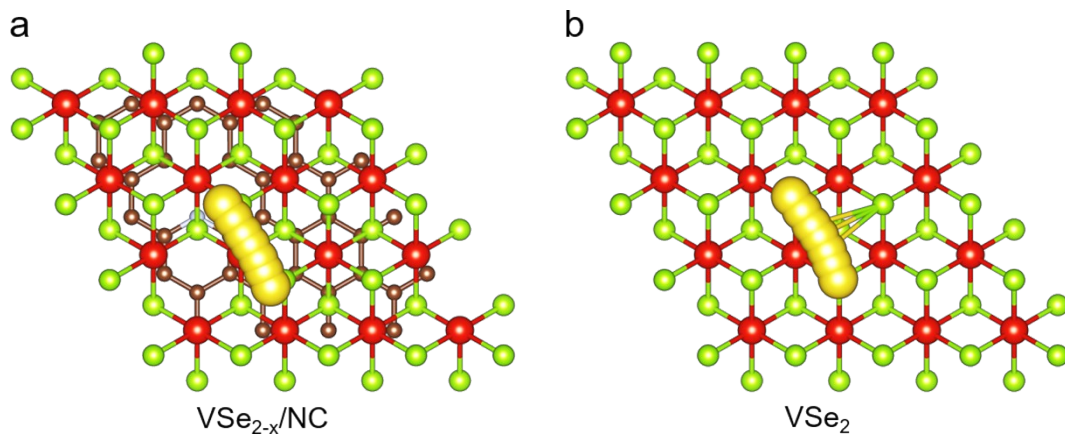

Fig. S16 DFT calculations of  $\text{Na}^+$  diffusion pathways on  $\text{VSe}_{2-x}/\text{NC}$  (a) and pure  $\text{VSe}_2$  (b). A relatively low migration barrier is obtained for  $\text{VSe}_{2-x}/\text{NC}$ .

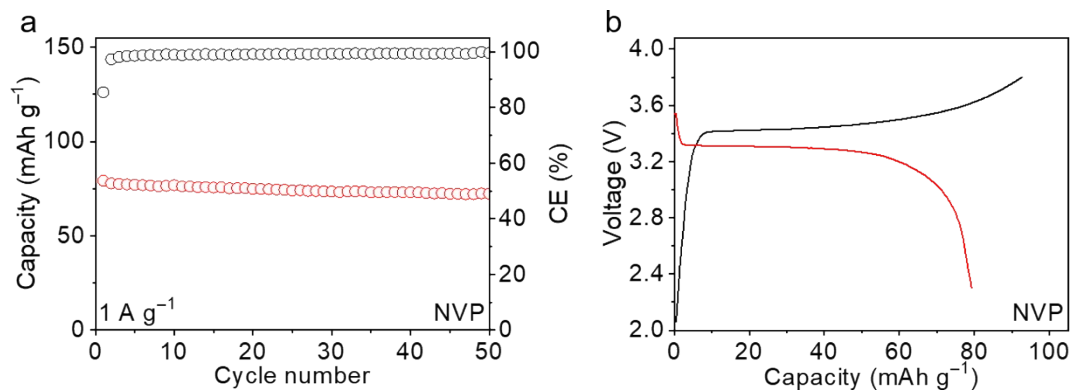

Fig.S17 Electrochemical performances of NVP cathodes. (a) Cycling performance of NVP at the current density of  $1 \text{ A g}^{-1}$ . (b) Galvanostatic charging/discharging curves of NVP in the first cycle at the current density of  $1 \text{ A g}^{-1}$ .

Table S1. The capacity comparison of VSe<sub>2-x</sub>/NC with other vanadium-based chalcogenides

| Material                  | Current density (A g <sup>-1</sup> ) | Capacity (mAh g <sup>-1</sup> ) | Ref. |
|---------------------------|--------------------------------------|---------------------------------|------|
| VSe <sub>2</sub> @PPy     | 1                                    | 333.6                           | 1    |
|                           | 2                                    | 270.9                           |      |
|                           | 3                                    | 266.8                           |      |
|                           | 5                                    | 262.9                           |      |
|                           | 10                                   | 260.0                           |      |
| VSe <sub>2</sub> @rGO     | 0.05                                 | 365.0                           | 2    |
|                           | 0.1                                  | 330.0                           |      |
|                           | 0.2                                  | 313.0                           |      |
|                           | 0.5                                  | 270.0                           |      |
|                           | 1                                    | 239.0                           |      |
|                           | 2                                    | 208.4                           |      |
|                           | 5                                    | 163.8                           |      |
| VS <sub>2</sub>           | 0.1                                  | 175.0                           | 3    |
|                           | 0.2                                  | 150.0                           |      |
|                           | 0.5                                  | 130.0                           |      |
|                           | 1                                    | 100.0                           |      |
| VS <sub>4</sub> @rGO      | 0.2                                  | 552.0                           | 4    |
|                           | 0.5                                  | 471.0                           |      |
|                           | 1                                    | 422.0                           |      |
|                           | 2                                    | 340.0                           |      |
|                           | 5                                    | 238.0                           |      |
|                           | 10                                   | 173.0                           |      |
|                           | 20                                   | 123.0                           |      |
| VS <sub>2</sub> nanosheet | 0.1                                  | 250.0                           | 5    |
|                           | 0.5                                  | 205.0                           |      |
|                           | 1                                    | 200.0                           |      |
|                           | 2                                    | 195.0                           |      |
|                           | 5                                    | 180.0                           |      |
|                           | 10                                   | 170.0                           |      |
|                           | 15                                   | 160.0                           |      |
|                           | 20                                   | 150.0                           |      |

|                                    |     |       |           |
|------------------------------------|-----|-------|-----------|
|                                    | 0.2 | 548.0 |           |
|                                    | 0.5 | 508.0 |           |
| V <sub>5</sub> S <sub>8</sub> @C   | 1   | 464.0 | 6         |
|                                    | 2   | 407.0 |           |
|                                    | 5   | 304.0 |           |
|                                    | 10  | 190.0 |           |
|                                    |     |       |           |
| V <sub>3</sub> S <sub>4</sub>      | 0.2 | 481.0 | 7         |
|                                    | 0.5 | 424.0 |           |
|                                    | 1   | 388.0 |           |
|                                    | 2   | 348.0 |           |
|                                    |     |       |           |
| V <sub>3</sub> S <sub>4</sub> @CNF | 0.1 | 400.0 | 8         |
|                                    | 0.2 | 380.0 |           |
|                                    | 0.5 | 345.0 |           |
|                                    | 1   | 305.0 |           |
|                                    | 2   | 265.0 |           |
|                                    | 5   | 200.0 |           |
|                                    | 10  | 185.0 |           |
| VSe <sub>2-x</sub> /NC             | 0.5 | 584.4 | This work |
|                                    | 1   | 523.8 |           |
|                                    | 2   | 475.9 |           |
|                                    | 5   | 448.7 |           |
|                                    | 10  | 432.1 |           |

1. Y. H. Yi, X. Du, Z. P. Zhao, Y. Liu, H. Guan, X. F. Liu, X. D. Pei, S. Zhang and D. Li, *ACS Nano*, 2022, **16**, 7772–7782.
2. X. Zhang, Q. He, X. M. Xu, T. Xiong, Z. T. Xiao, J. S. Meng, X. P. Wang, L. Wu, J. H. Chen and L. Q. Mai, *Adv. Energy Mater.*, 2020, **10**, 1904118.
3. S. Z. Wang, F. Gong, S. Z. Yang, J. X. Liao, M. Q. Wu, Z. Q. Xu, C. Chen, X. F. Yang, F. P. Zhao, B. Wang, Y. S. Wang and X. L. Sun, *Adv. Funct. Mater.*, 2018, **28**, 1801806.
4. R. M. Sun, Q. L. Wei, J. Z. Sheng, C. W. Shi, Q. Y. An, S. J. Liu and L. Q. Mai, *Nano Energy*, 2017, **35**, 396–404.
5. C. H. Yang, X. Ou, X. H. Xiong, F. H. Zheng, R. Z. Hu, Y. Chen, M. L. Liu and K. Huang, *Energy Environ. Sci.*, 2017, **10**, 107–113.
6. Y. J. Zhang, J. L. Li, L. Ma, H. B. Li, X. T. Xu, X. J. Liu, T. Lu and L. K. Pan, *Chem. Eng. J.*, 2022, **427**, 130936.
7. G. Yao, P. Niu, Z. Q. Li, Y. Xu, L. Z. Wei, H. L. Niu, Y. Yang, F. C. Zheng and Q. W. Chen, *Chem. Eng. J.*, 2021, **423**, 130229.
8. Y. K. Wu, H. Chen, L. C. Zhang, Q. L. Li, M. W. Xu and S.-J. Bao, *Inorg. Chem. Front.*, 2019, **6**, 2935–2943.
